# Supplementary material for: Metabolic shift underlies recovery in reversible infantile respiratory chain deficiency
Source: PubMed Central journal article supplement (PMC7705457; doi:10.15252/embj.2020105364), 2020-10-31

# Figure 3 A

SDHA

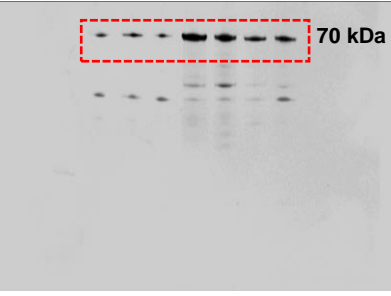

NDUFA9

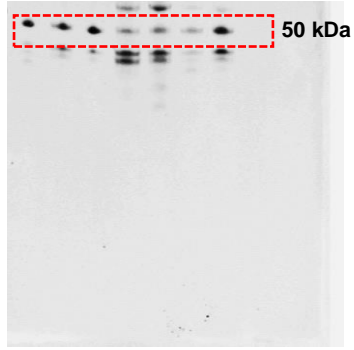

MT-CO1

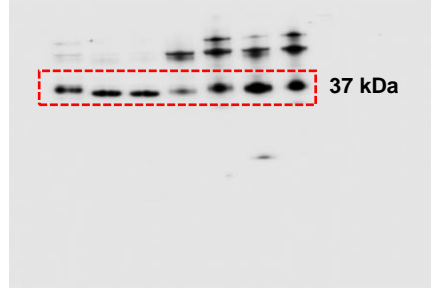

MT-CO2

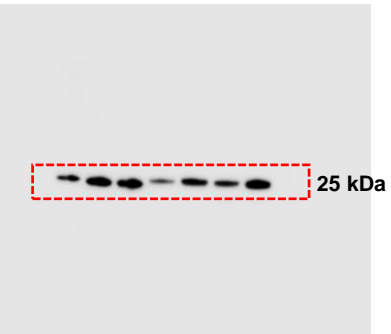

TOM20

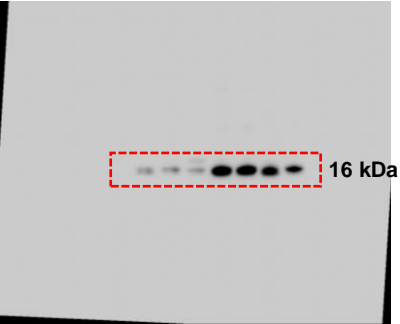

VCL

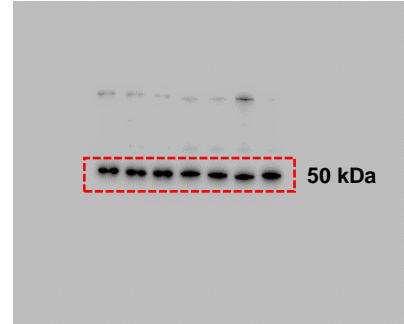

# Figure 3 D

GCN2

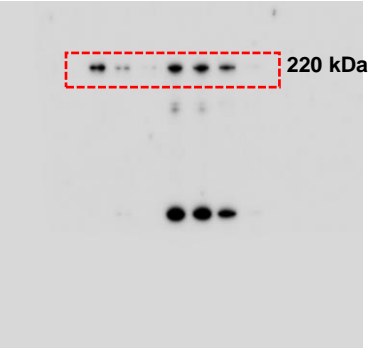

SLC7A11

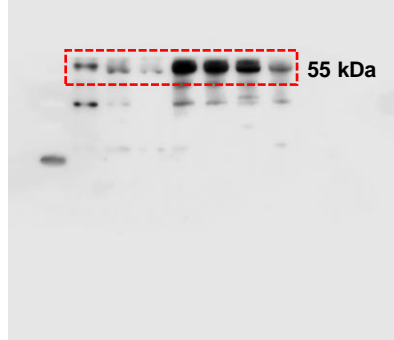

ATF4

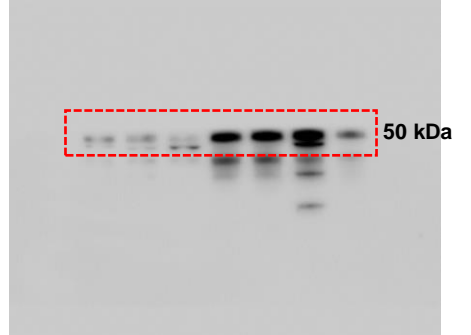

VCL

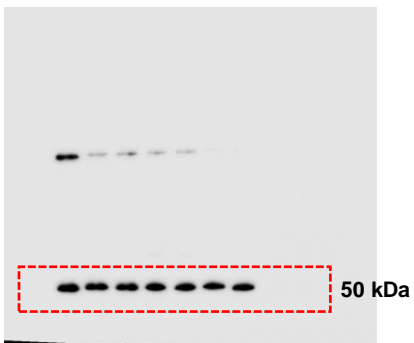

Supplement: EMBJ-39-e105364-s006.pdf [file EMBJ-39-e105364-s006.pdf]
