# Supplementary material for: Metabolic shift underlies recovery in reversible infantile respiratory chain deficiency
Source: PubMed Central journal article supplement (PMC7705457; doi:10.15252/embj.2020105364), 2020-10-31

# Figure 4 A

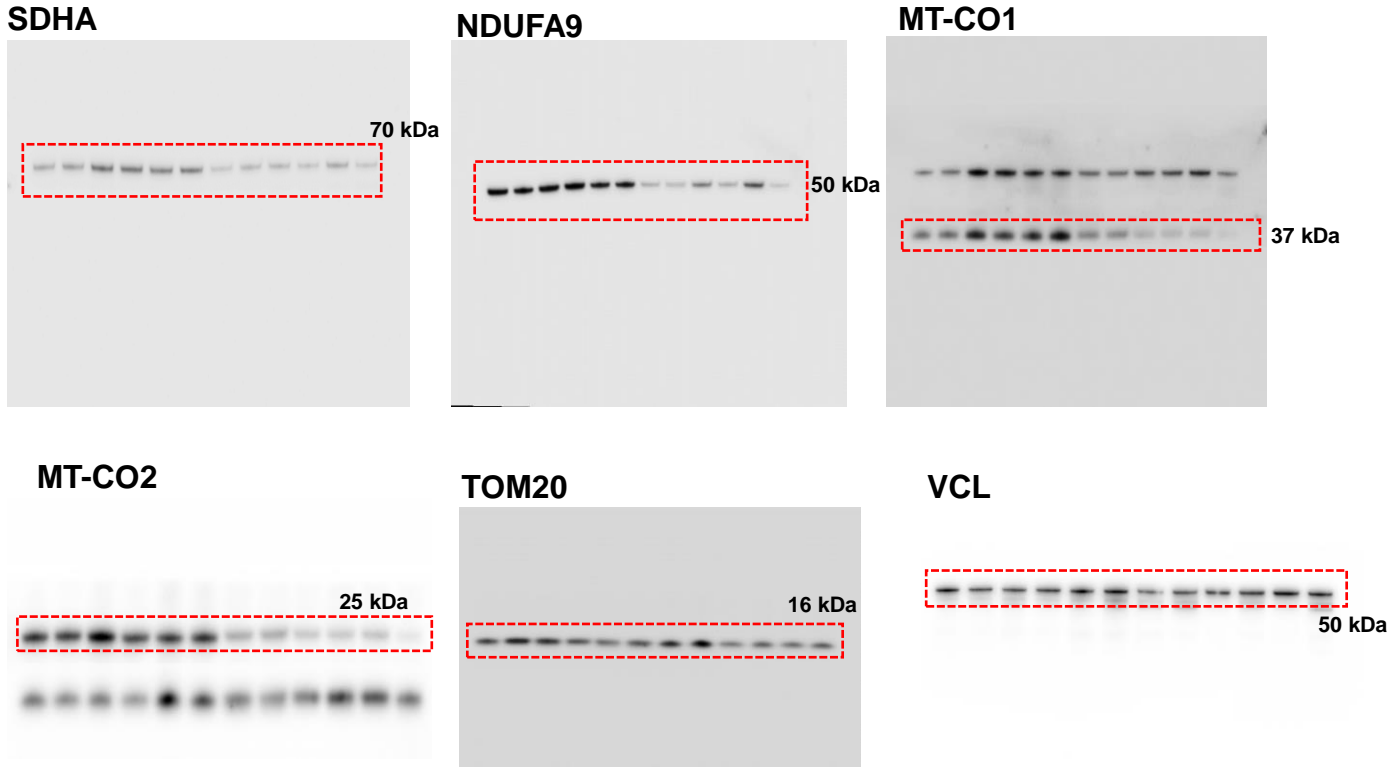

# Figure 4 C

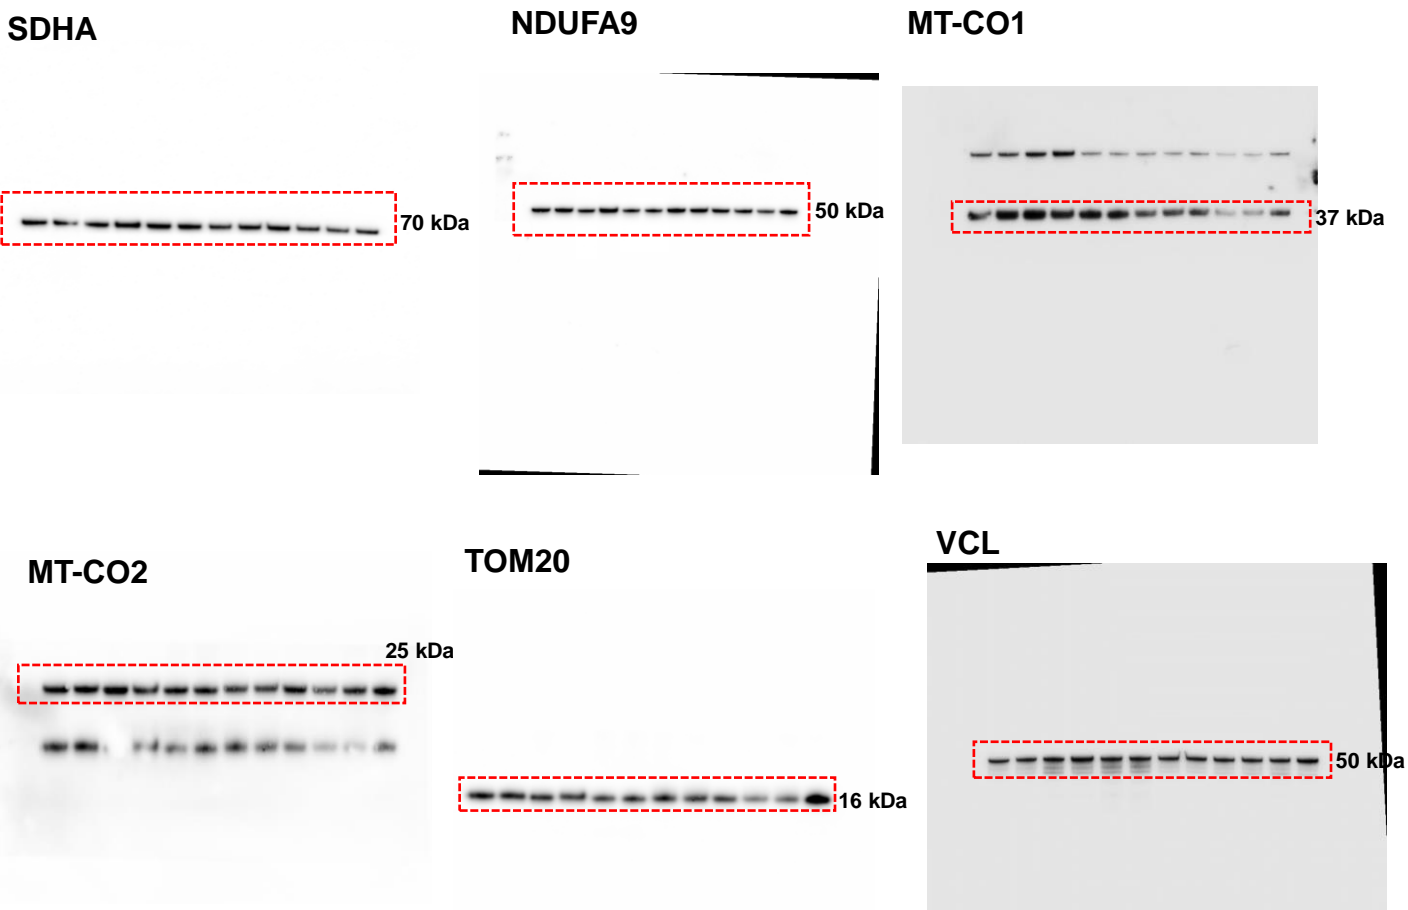

Supplement: EMBJ-39-e105364-s007.pdf [file EMBJ-39-e105364-s007.pdf]
