# Supplementary material for: Metabolic shift underlies recovery in reversible infantile respiratory chain deficiency
Source: EMBO J. 2020 Oct 31;39(23):e105364. doi: 10.15252/embj.2020105364 (PMC7705457; doi:10.15252/embj.2020105364)
Supplement: Supplementary file 1 — Expanded View Figures PDF [file EMBJ-39-e105364-s001.pdf]

## Expanded View Figures

**Figure EV1. Pedigrees, mtDNA haplotypes and variant counts in the 19 RIRCD families with homoplasmic m.14674T>C.**

- A Pedigrees and genetic variants. The \* symbol indicates the individuals where DNA analysis was performed while circles represent female, square represents male and the filled-in square or circle represent individuals expressing mutations while deceased individuals were marked with a diagonal line.
- B Exome mtDNA read depth and mtDNA haplogroups in the families homoplasmic for m.14674T>C.
- C Variant Scatter/boxplot shows the significant difference between mean per group damaging allele counts (RIRCD affected vs unaffected vs 1,044 × 1000 Genomes control exomes) in the genes *EARS2*, *TRMU*, *QRS1*, *GOT2*, *GLS*, *MSS51* and m.14674T>C. The counts are from individual patients and controls thus one point on the boxplot represents damaging allele counts for 1 person. The central band represents the median, the lower and upper hinges correspond to the first and third quartiles (25 and 75%) while the whiskers extend to the highest and lowest points within the data (1.5× the inter-quartile range).

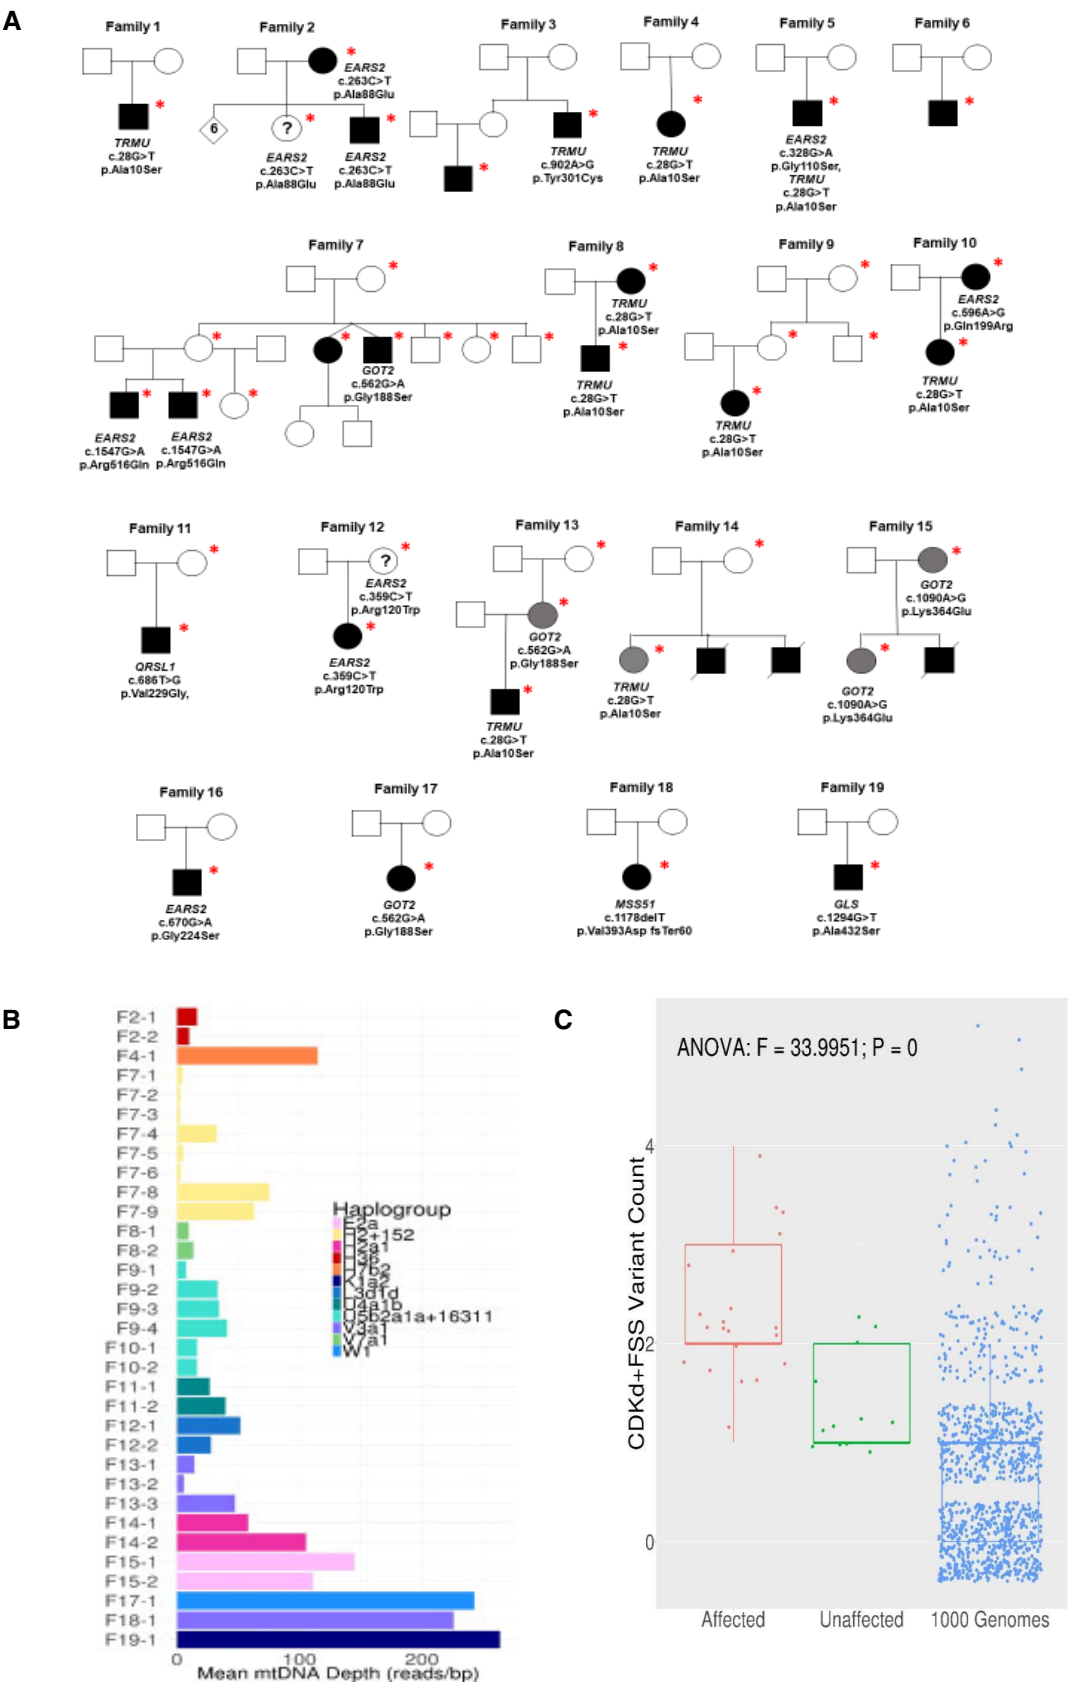

Figure EV1.

**Figure EV2. Summary of variants in our cohort.**

- A Mitochondrial haplogroups and digenic nuclear variants in affected RIRCD family members.
- B Number of exome variants at each stage of filtering in total and for affected and unaffected individuals in RIRCD families with homoplasmic m.14674T>C.

A

| Family | Haplogroup    | Relationship    | Nuclear Risk Variants |                    |          |
|--------|---------------|-----------------|-----------------------|--------------------|----------|
|        |               |                 | Gene                  | Protein            | Genotype |
| F1     | n. d.         | Proband         | <i>TRMU</i>           | p.Ala10Ser         | 0/1      |
| F2     | H36           | Proband         | <i>EARS2</i>          | p.A88Glu           | 0/1      |
|        |               | Mother of F2/1  | <i>EARS2</i>          | p.Ala88Glu         | 0/1      |
| F3     | n. d.         | Uncle of F3/2   | <i>TRMU</i>           | p.Tyr301Cy         | 0/1      |
| F4     | H7b2          | Proband         | <i>TRMU</i>           | p.Ala10Ser         | 0/1      |
| F5     | V7a1          | Proband         | <i>EARS2</i>          | p.Gly110Ser*       | 0/1      |
|        |               |                 | <i>TRMU</i>           | p.Ala10Ser         | 0/1      |
| F7     | H+152         | Sibling of F7/2 | <i>EARS2</i>          | p.Arg516Gln*       | 0/1      |
|        |               | Sibling of F7/1 | <i>EARS2</i>          | p.Arg516Gln*       | 0/1      |
|        |               | Uncle of F7/1-2 | <i>GOT2</i>           | p.Gly188Ser        | 0/1      |
| F8     | U5b2a1a+16311 | Proband         | <i>TRMU</i>           | p.Ala10Ser         | 0/1      |
| F9     | U5b2a1a+16311 | Proband         | <i>TRMU</i>           | p.Ala10Ser         | 0/1      |
| F10    | U5b2a1a+16311 | Proband         | <i>TRMU</i>           | p.Ala10Ser         | 0/1      |
|        |               | Mother of F8/1  | <i>EARS2</i>          | p.Gln199Arg        | 0/1      |
| F11    | U4a1b         | Proband         | <i>QRSL1</i>          | p.Val229Gly        | 0/1      |
| F12    | L3d1d         | Proband         | <i>EARS2</i>          | p.Arg120Trp        | 0/1      |
|        |               | Proband         | <i>TRMU</i>           | p.Ala10Ser         | 0/1      |
| F13    | V3a1          | Proband         | <i>TRMU</i>           | p.Ala10Ser         | 0/1      |
|        |               | Mother of F13/1 | <i>GOT2</i>           | p.Gly188Ser        | 0/1      |
| F14    | H2a1          | Sister of F14/1 | <i>TRMU</i>           | p.Ala10Ser         | 0/1      |
| F15    | E2a           | Sister of F15/1 | <i>GOT2</i>           | p.Lys364Glu        | 0/1      |
|        |               | Mother of F15/1 | <i>GOT2</i>           | p.Lys364Glu        | 0/1      |
| F17    | W1            | Proband         | <i>GOT2</i>           | p.Gly188Ser        | 0/1      |
| F18    | V3a1          | Proband         | <i>MSS51</i>          | p.Val393AspfsTer60 | 0/1      |
| F19    | K1a2          | Proband         | <i>GLS</i>            | p.Ala432Ser        | 0/1      |

B

| Type of Variant                                                                | Total Number of Variants | Affected Only* (n=18) | Unaffected Only* (n=12) |
|--------------------------------------------------------------------------------|--------------------------|-----------------------|-------------------------|
| Total Variants                                                                 | 4,907,159                | 1,847,621             | 1,106,024               |
| Total Protein Altering                                                         | 42,473                   | 14,885                | 5,725                   |
| Conserved (2+)                                                                 | 15,775                   | 6,051                 | 2,344                   |
| Predicted Damaging (5+)                                                        | 13,816                   | 5,458                 | 2,163                   |
| Conserved (2+), Damaging (5+)                                                  | 10,991                   | 4,340                 | 1,705                   |
| Conserved (2+), Damaging (5+), Known Domain                                    | 5,013                    | 2,022                 | 779                     |
| <b>Conserved, Damaging, Known Domain, Splicing, Stop-Loss/Gain, Frameshift</b> | <b>6,998</b>             | <b>2,698</b>          | <b>1,067</b>            |

Figure EV2.

**Figure EV3. Functional characterisation of the p.Arg23Trp variant in PDE12.**

- A Western blot of total cell lysate of *PDE12* knockout cells expressing WT *PDE12*, p.Glu351Ala (catalytic mutant),  $\Delta 16$  (coding for *PDE12* lacking 16 first aa),  $\Delta 23$  mutants (coding for *PDE12* lacking 23 first aa) and p.Arg23Trp *PDE12* cDNA. B-actin was used as loading control. Our previous study (Pearce *et al*, 2017) showed that the steady-state levels of OXPHOS complexes are affected in the *PDE12* KO as compared to the WT control cells.
- B Radioactive MPAT assay for 16S mt-rRNA extracted from HEK293T (WT), *PDE12* knockout cells (KO) and for *PDE12* KO cells expressing WT *PDE12*, p.Glu351Ala,  $\Delta 16$ ,  $\Delta 23$  mutants and p.Arg23Trp *PDE12* cDNA for 24 hr. Experiments and cell lines as described in (Pearce *et al*, 2017).
- C Immunofluorescence to confirm mitochondrial localisation of the p.Arg23Trp *PDE12* variant in human cells. TOM20, translocator of the outer mitochondrial membrane 20. Scale bar = 20  $\mu$ m.

Source data are available online for this figure.

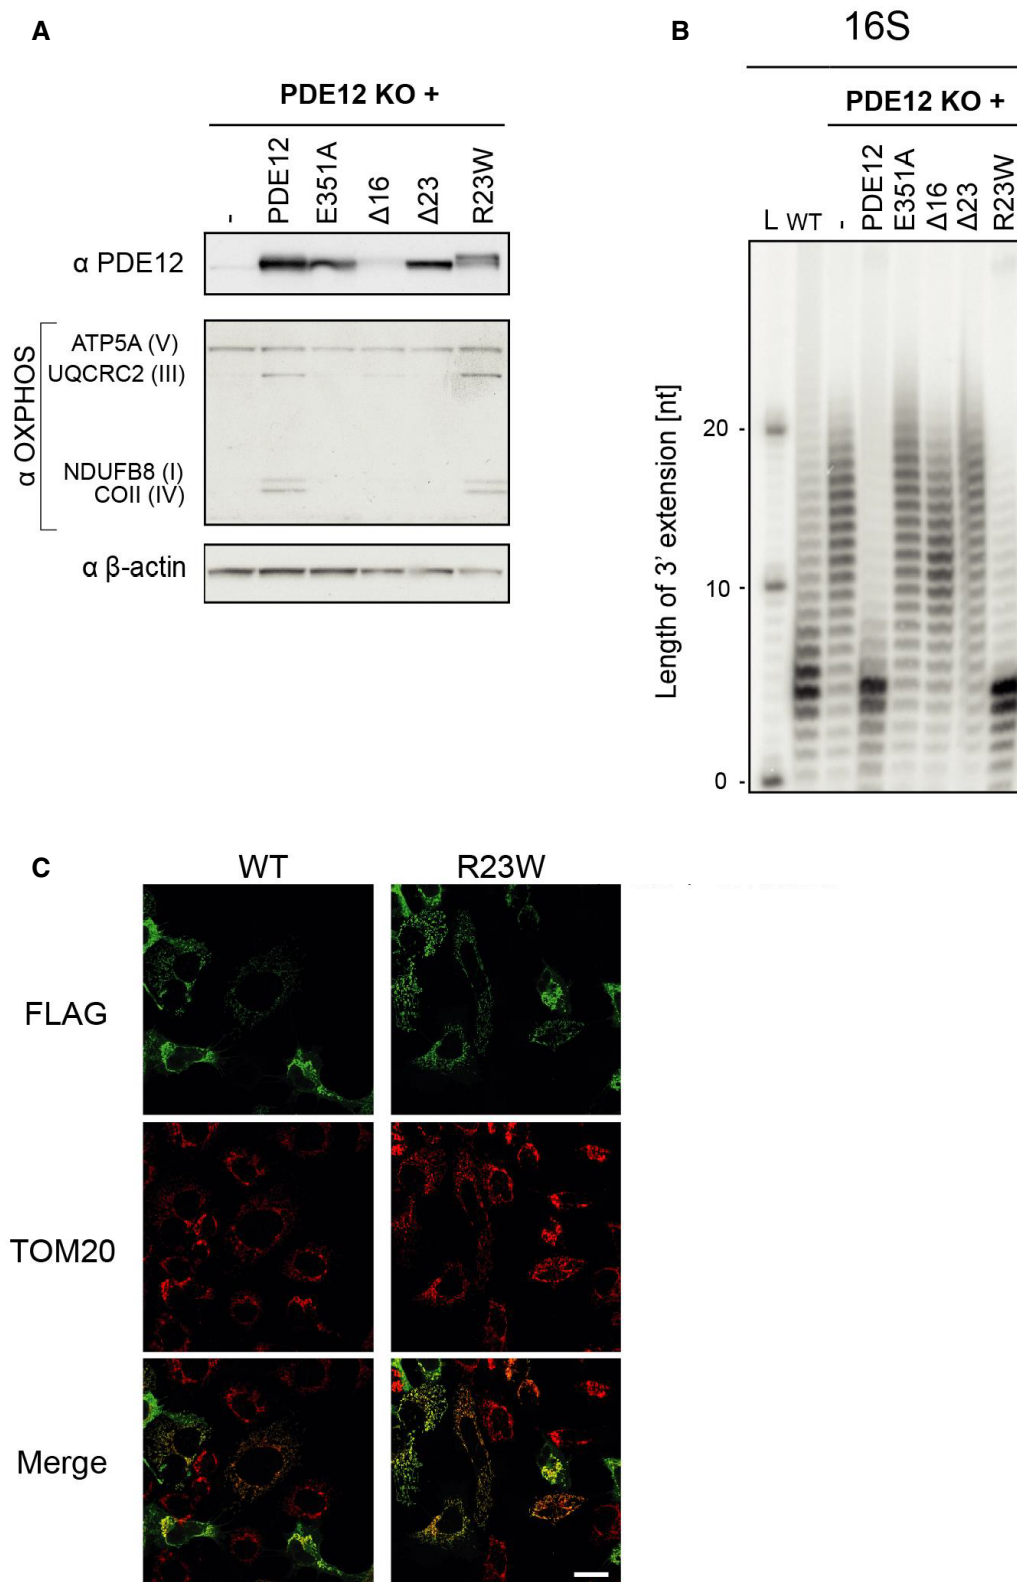

Figure EV3.

**Figure EV4. Heat map of the top 100 transcripts altered in RNA-seq data resulted from muscle biopsies of RIRCD compared to control muscle resulted from DESeq2 analysis.**

Gene expression is showed in normalized  $\log_2$  counts. Differentially expressed genes were selected based on the  $\log_2$  counts and  $P_{adj} < 0.05$ .

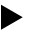

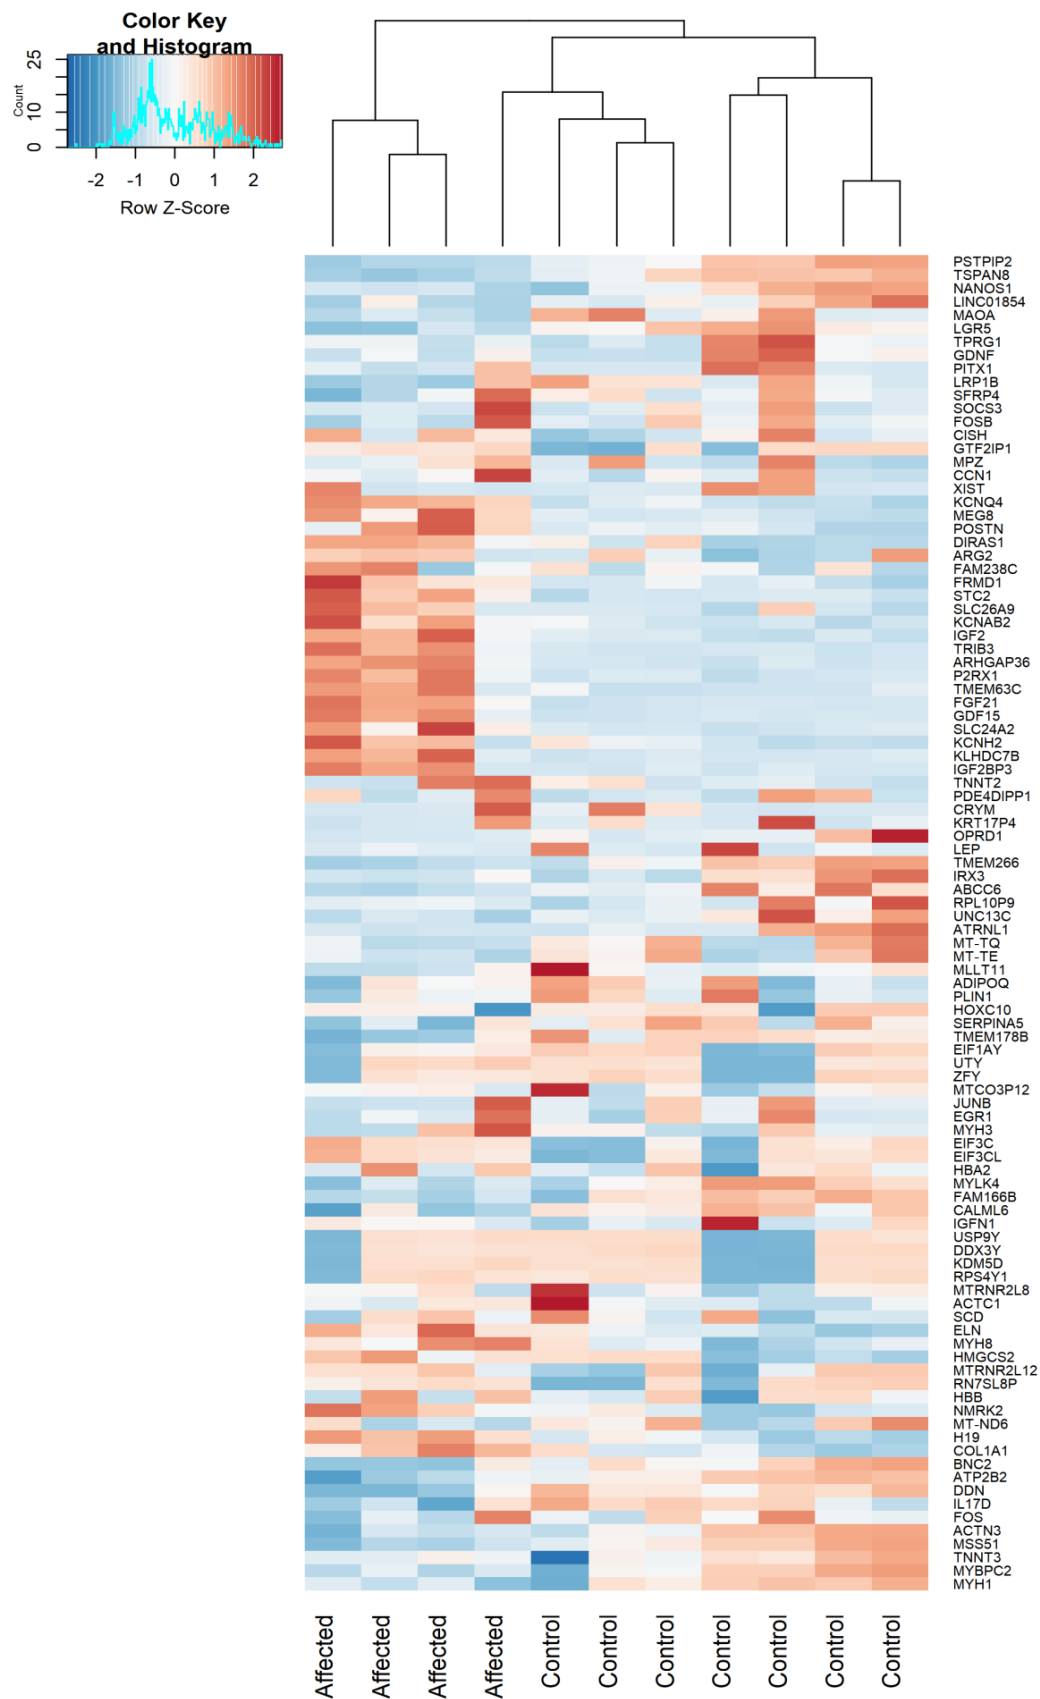

Figure EV4.

**Figure EV5. Aminoacylation assay in fibroblasts.**

Aminoacylation assay of mt-tRNA<sup>Glu</sup> and mt-tRNA<sup>Gln</sup> in fibroblasts carrying digenic mutations in mtDNA (m.14674T>C) and in *EARS2* (p.Arg516Gln; F7/1M, F7/2M), carrying only m.14674T>C (F7/5F, F7/7F) and healthy controls. The cells were cultured in low (low aa) and high amino acid (aa) concentrations. “dAc” indicated deacylated samples while “Ac” represents the aminoacylated tRNA. There is no relevant difference in the aminoacylation of fibroblasts of patients with digenic mutations, carriers of m.14674T>C and healthy controls.

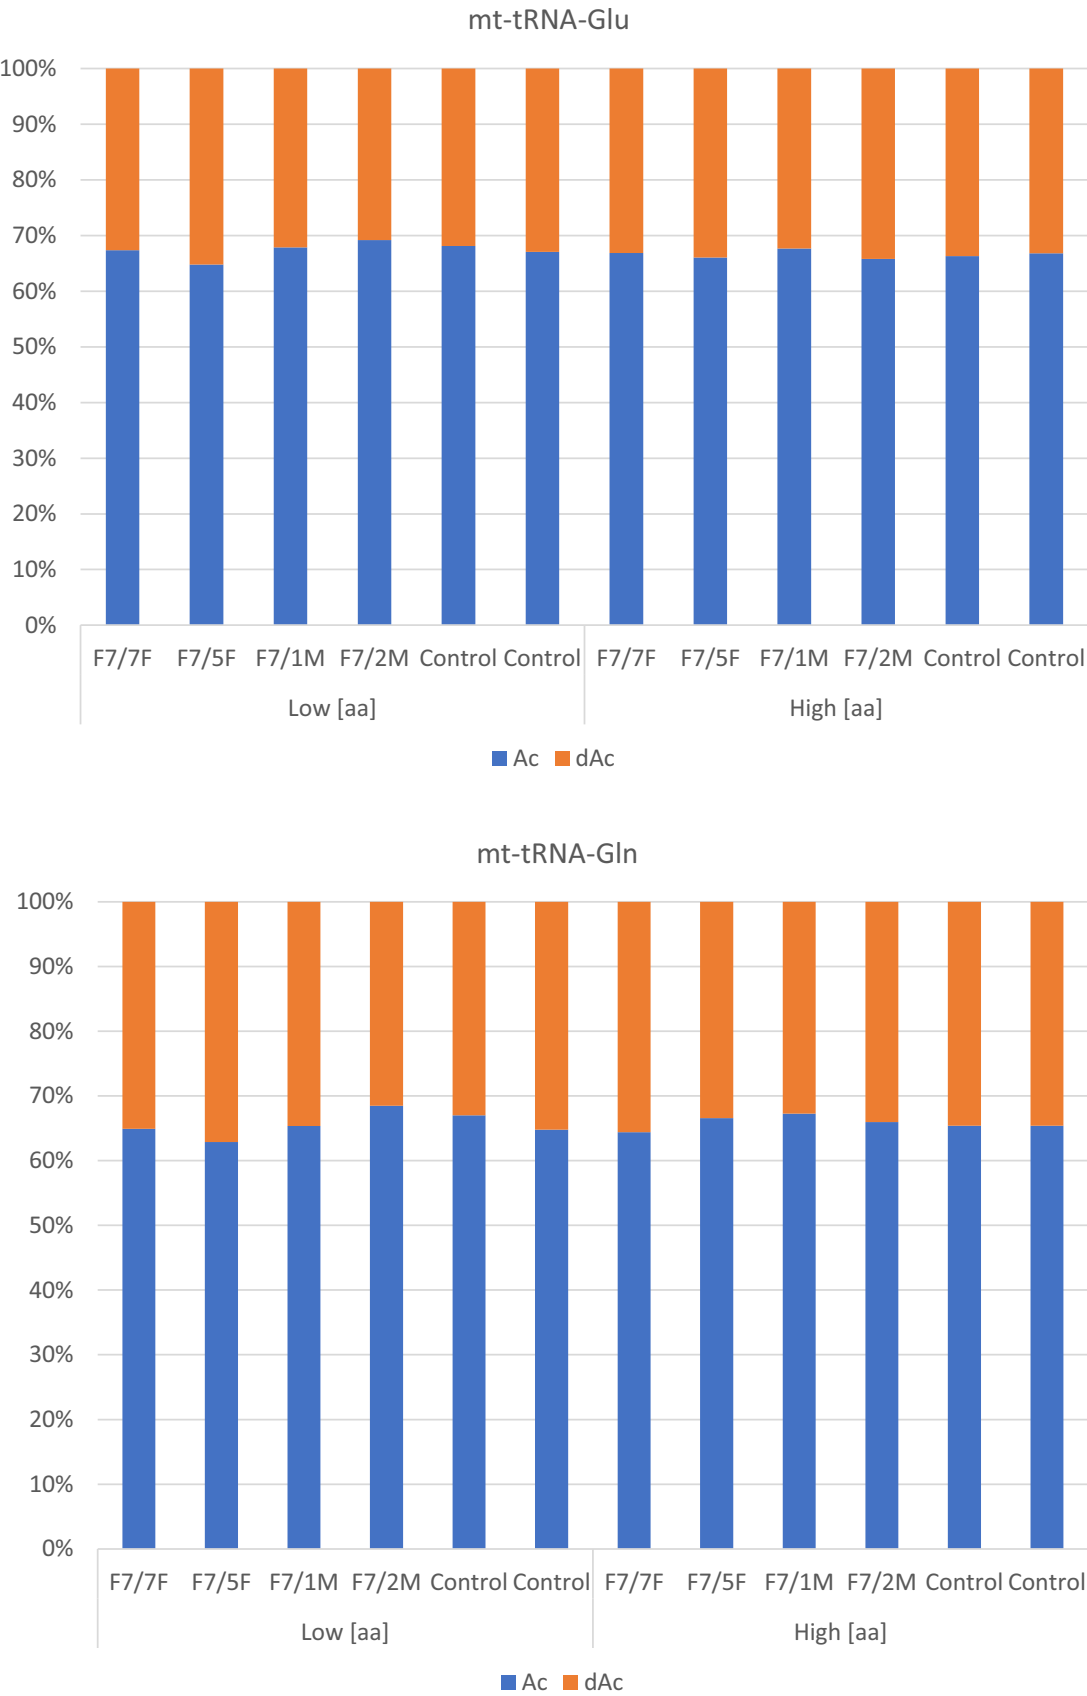

Figure EV5.
